# Supplementary material for: Epidemiology of dengue in a high-income country: a case study in Queensland, Australia
Source: PubMed Central journal article supplement (PMC4261250; doi:10.1186/1756-3305-7-379), 2014-08-19

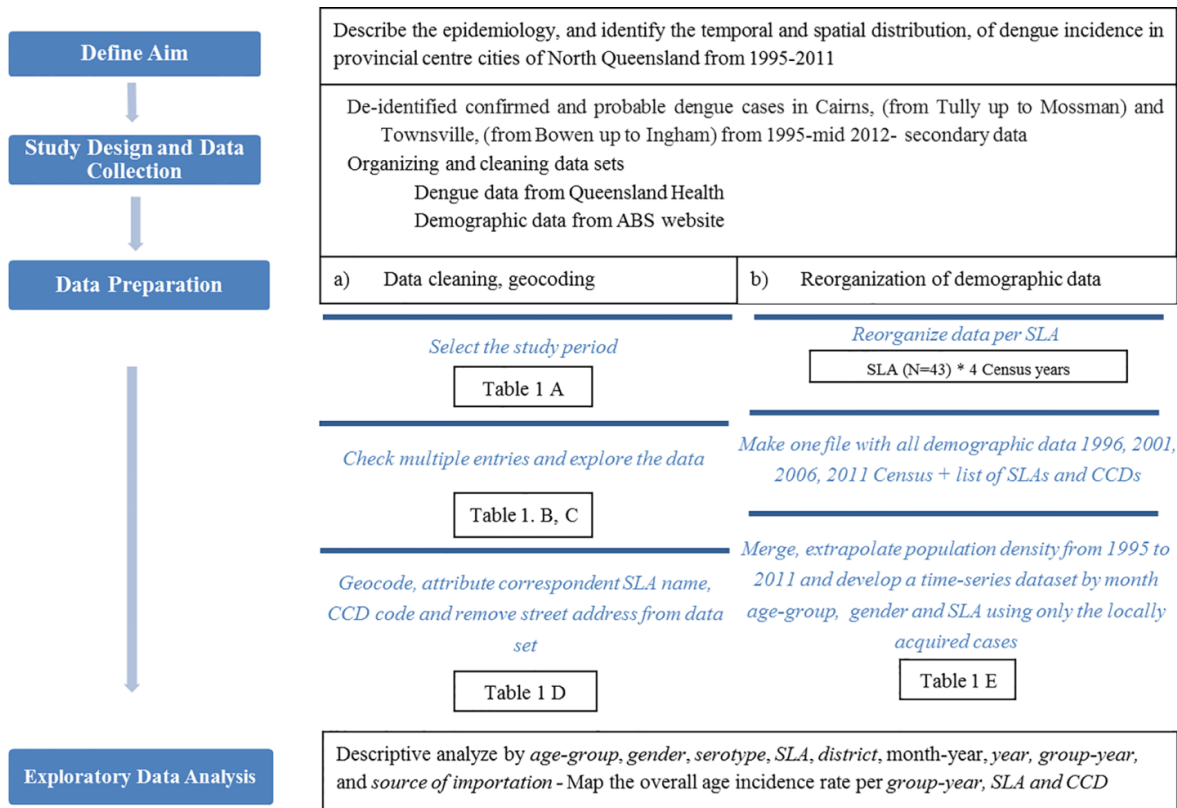

Supplement: 13071_2014_1639_MOESM1_ESM.pdf [file 13071_2014_1639_MOESM1_ESM.pdf]
