# Supplementary material for: Epidemiology of dengue in a high-income country: a case study in Queensland, Australia
Source: PubMed Central journal article supplement (PMC4261250; doi:10.1186/1756-3305-7-379), 2014-08-19
Supplement: 13071_2014_1639_MOESM2_ESM.pdf [file 13071_2014_1639_MOESM2_ESM.pdf]

## Additional file2 Summary of cleaning process and data set exploration (data set 1)

| <b>Data set 1</b>                                                                                             | <b>Observations (%)</b> | <b>Action</b>      |
|---------------------------------------------------------------------------------------------------------------|-------------------------|--------------------|
| <b>A</b> <i>Cleaning process 1</i><br><i>Select the study period</i>                                          | <i>N = 3187</i>         |                    |
| Year 2012                                                                                                     | 48 (1.5)                | removed            |
| <b>B</b> <i>Cleaning process 2</i><br><i>Check multiple entries</i>                                           | <i>N = 3139</i>         | <i>saved</i>       |
| “Equivocal” and “negative” <i>Test Results</i>                                                                | 532 (16.9)              | removed            |
| Double entry of individuals                                                                                   | 30 (0.9)                | removed            |
| <b>C</b> <i>Cleaning process 3</i><br><i>Information about the data set</i>                                   | <i>N = 2576</i>         | <i>saved</i>       |
| Epi-linked cases                                                                                              | 60 (1.9)                | kept               |
| Missing <i>Age</i>                                                                                            | 6 (0.2)                 | kept               |
| Missing <i>Onset Date</i>                                                                                     | 0 (-)                   | -                  |
| ”Indeterminate”, ”not stated/unknown” <i>Gender</i>                                                           | 18 (0.7)                | kept               |
| Missing <i>Serogroup code</i>                                                                                 | 483 (18.8)              | kept               |
| <i>Country of Source</i> “not stated” and ”Inadequately described”                                            | 481 (18.7)              | kept               |
| Missing <i>locality name</i>                                                                                  | 0 (-)                   | -                  |
| Misspelling <i>Street Name</i>                                                                                | 107 (4.1)               | corrected          |
| <i>Street Number</i> in the wrong cell                                                                        | 5 (0.2)                 | corrected          |
| Missing <i>Street Name</i>                                                                                    | 258 (10.0)              | kept               |
| Missing <i>Street Number</i>                                                                                  | 309 (11.9)              | kept               |
| <b>D</b> <i>Cleaning process 4</i><br><i>Preparation for Time series data set for locally –acquired cases</i> | <i>N = 2576</i>         | <i>saved</i>       |
| Locally-acquired cases                                                                                        | 2418 (93.9)             | kept               |
| CCD code not attributed                                                                                       | 306 (11.9)              | kept               |
| SLA name not stated or ‘Overseas - other’                                                                     | 132 (5.1)               | removed            |
| ”Indeterminate” <i>Age</i>                                                                                    | 5 (0.2)                 | removed            |
| ”Indeterminate” <i>Gender</i>                                                                                 | 19 (0.7)                | removed            |
| <b>E</b> <i>Cleaning process 5</i><br><i>Develop the time-series dataset by :</i>                             | <i>N= 2262</i>          |                    |
| SLA                                                                                                           | 43                      |                    |
| Age-group                                                                                                     | 17                      |                    |
| Gender                                                                                                        | 2                       |                    |
| Year                                                                                                          | 17                      |                    |
| Month                                                                                                         | 12                      |                    |
| <b>Total time-series data set</b>                                                                             | <b>= 298248</b>         | saved and analysed |
