# Supplementary material for: Epidemiology of dengue in a high-income country: a case study in Queensland, Australia
Source: PubMed Central journal article supplement (PMC4261250; doi:10.1186/1756-3305-7-379), 2014-08-19
Supplement: 13071_2014_1639_MOESM3_ESM.pdf [file 13071_2014_1639_MOESM3_ESM.pdf]

### Additional file 3 Poisson regression analysis (stepwise)

```
fm_pois <- glm(ninf ~ Gender + agegrp + Year + Mon + SLA, family =  
poisson(link = "log"), offset = log(popSLA + 0.5), data = Tab2)
```

```
> drop1(fm_pois, test = "Chisq")
```

Single term deletions

Model:

```
ninf ~ agegrp + Gender + Year + SLA + Mon  
      Df Deviance   AIC    LRT Pr(>Chi)  
<none>      12246   15786  
agegrp 16  12548   16056  302.4 <2e-16 ***  
Gender  1  12249   15787    3.8  0.05063 .  
Year   16  16418   19926 4172.1 <2e-16 ***  
SLA    42  15234   18690 2988.5 <2e-16 ***  
Mon    11  14203   17721 1957.7 <2e-16 ***
```

---

```
Signif. codes:  0 '***' 0.001 '**' 0.01 '*' 0.05 '.' 0.1 ' ' 1
```
