# Supplementary material for: Epidemiology of dengue in a high-income country: a case study in Queensland, Australia
Source: PubMed Central journal article supplement (PMC4261250; doi:10.1186/1756-3305-7-379), 2014-08-19
Supplement: 13071_2014_1639_MOESM4_ESM.pdf [file 13071_2014_1639_MOESM4_ESM.pdf]

**Additional file 4 Census Collection Districts and their corresponding Statistical Local Area with a dengue incidence rate > 20 by group year (1995-2004 and 2005-2011) in North Queensland, Australia (based on figure 5)**

| <b>CCDs (IR&gt;20) (Fig 5)</b> |                  | <b>Corresponding SLA</b> |
|--------------------------------|------------------|--------------------------|
| <b>1995-2004</b>               | <b>2005-2011</b> |                          |
| <b>3011808</b>                 | 3011706          | Cairns Barron            |
| <b>3011809</b>                 | <b>3011808</b>   |                          |
| <b>3011810</b>                 | <b>3011809</b>   |                          |
|                                | <b>3011810</b>   |                          |
| 3011010                        | <b>3011101</b>   | Cairns Central Suburbs   |
| <b>3011101</b>                 | 3011109          |                          |
| 3011102                        | 3011114          |                          |
| 3011103                        | 3011305          |                          |
| 3011310                        | 3011403          |                          |
| 3011313                        | 3011502          |                          |
| 3011314                        | 3011503          |                          |
|                                |                  |                          |
| 3011106                        | 3011006          | Cairns City              |
| 3011107                        | 3011103          |                          |
| 3011108                        | 3011104          |                          |
| 3011204                        | 3011105          |                          |
| <b>3011205</b>                 | <b>3011205</b>   |                          |
| 3011206                        | 3011211          |                          |
| 3011218                        | 3011212          |                          |
|                                | 3011213          |                          |
|                                | 3011214          |                          |
|                                | 3011215          |                          |
| 3011001                        | 3011406          | Cairns Mt Whitfield      |
|                                | 3011408          |                          |
| -                              | 3011606          | Cairns Northern Suburbs  |
| 3012205                        | 3012201          | Cairns Trinity           |
|                                | 3012705          |                          |
| 3010903                        | -                | Douglas (S)              |
| 3010904                        |                  |                          |
| 3010914                        |                  |                          |
| -                              | 3012404          | Johnstone (S)            |
|                                | 3012405          |                          |
|                                | 3012407          |                          |
| 3041405                        | -                | North Ward-Castle Hill   |
| -                              | 3042002          | South Townsville         |
|                                | 3042004          |                          |
|                                | 3042005          |                          |
