# Supplementary material for: Epidemiology of dengue in a high-income country: a case study in Queensland, Australia
Source: PubMed Central journal article supplement (PMC4261250; doi:10.1186/1756-3305-7-379), 2014-08-19
Supplement: 13071_2014_1639_MOESM5_ESM.pdf [file 13071_2014_1639_MOESM5_ESM.pdf]

**Additional file 5 Number and rate of dengue infections among 2262 locally-acquired cases in North Queensland, Australia (resulting from cleaning process E Table 1)**

| Variables                           | Cities in Shire      | N cases | Mean SLA pop | Rate *100,000 | Robust (se) | IRR         | 95 % CI (p_value) |        |
|-------------------------------------|----------------------|---------|--------------|---------------|-------------|-------------|-------------------|--------|
|                                     |                      |         |              |               |             |             | (<0.001)          |        |
| <i>SLA</i>                          |                      |         |              |               |             |             |                   |        |
| Aitkenvale                          |                      | 4       | 4900         | 0.82          | 0.50        | 0.03        | -4.53             | -2.54  |
| <b>Cairns (C) - Barron</b>          |                      | 237     | 19171        | <b>12.36</b>  | 0.12        | <b>0.33</b> | -1.35             | -0.87  |
| <b>Cairns (C) - Central Suburbs</b> |                      | 457     | 22043        | <b>20.73</b>  | 0.11        | <b>0.68</b> | -0.61             | -0.18  |
| <b>Cairns (C) – City REF</b>        |                      | 430     | 11056        | <b>38.89</b>  | -           | -           | -                 | -      |
| <b>Cairns (C) - Mt Whitfield</b>    |                      | 176     | 11453        | <b>15.37</b>  | 0.13        | <b>0.48</b> | -0.99             | -0.48  |
| Cairns (C) - Northern Suburbs       |                      | 70      | 16245        | 4.31          | 0.17        | 0.14        | -2.29             | -1.64  |
| Cairns (C) - Pt B                   |                      | 10      | 5897         | 1.7           | 0.33        | 0.07        | -3.32             | -2.04  |
| Cairns (C) - Trinity                |                      | 148     | 31744        | 4.66          | 0.12        | 0.15        | -2.13             | -1.64  |
| Cairns (C) – Western Suburbs        |                      | 86      | 11762        | 7.31          | 0.15        | 0.23        | -1.75             | -1.14  |
| Cardwell (S)                        | Tully, Innisfail     | 23      | 10388        | 2.21          | 0.29        | 0.08        | -3.12             | -1.99  |
| City                                |                      | 8       | 2261         | 3.54          | 0.36        | 0.10        | -2.99             | -1.57  |
| Cranbrook                           |                      | 26      | 6280         | 4.14          | 0.22        | 0.15        | -2.34             | -1.46  |
| Currajong                           |                      | 26      | 2759         | 9.42          | 0.23        | 0.35        | -1.52             | -0.61  |
| Dalrymple (S)                       | Dalrymple            | 1       | 3785         | 0.26          | 0.10        | 0.00        | -19.31            | -18.31 |
| Douglas                             |                      | 3       | 4454         | 0.67          | 0.59        | 0.02        | -5.19             | -2.89  |
| <b>Douglas (S)</b>                  | Mosmann/Port Douglas | 246     | 13300        | <b>18.5</b>   | 0.17        | <b>0.60</b> | -1.95             | -1.28  |
| Garbutt                             |                      | 10      | 2471         | 4.05          | 0.33        | 0.15        | -2.57             | -1.28  |
| Gulliver                            |                      | 4       | 2956         | 1.35          | 0.51        | 0.05        | -4.01             | -2.01  |
| Heatley                             |                      | 7       | 4396         | 1.59          | 0.39        | 0.06        | -3.59             | -2.06  |
| Hermit Park                         |                      | 12      | 3419         | 3.51          | 0.33        | 0.12        | 2.76              | -1.36  |
| Hyde Park-Mysterton                 |                      | 8       | 2270         | 3.52          | 0.37        | 0.12        | -2.79             | -1.36  |
| Johnstone (S)                       | South Johnstone      | 87      | 19252        | 4.52          | 0.16        | 0.17        | -2.09             | -1.46  |
| Kelso                               |                      | 2       | 8242         | 0.24          | 0.71        | 0.01        | -6.21             | -3.41  |
| Kirwan                              |                      | 11      | 20201        | 0.54          | 0.31        | 0.02        | -4.64             | -3.43  |
| Magnetic Island                     |                      | 1       | 2419         | 0.41          | 1.01        | 0.02        | -6.14             | -2.2   |
| Mareeba (S)                         | Mareeba              | 4       | 18407        | 0.22          | 0.58        | 0.01        | -6.28             | -4.01  |
| Mt Louisa-Mt St John-Bohle          |                      | 1       | 5040         | 0.2           | 0.10        | 0.00        | -18.31            | -17.91 |
| Mundingburra                        |                      | 15      | 3861         | 3.89          | 0.29        | 0.14        | -2.51             | -1.37  |
| Murray                              |                      | 3       | 9017         | 0.33          | 0.58        | 0.01        | -5.67             | -3.37  |
| North Ward-Castle Hill              |                      | 34      | 5956         | 5.71          | 0.20        | 0.19        | -2.05             | -1.26  |
| Oonoonba-Idalia-Cluden              |                      | 2       | 4891         | 0.41          | 0.71        | 0.01        | -5.92             | -3.13  |
| Pallarenda-Shelley Beach            |                      | 2       | 1004         | 1.99          | 0.71        | 0.08        | -3.99             | -1.2   |
| Pimlico                             |                      | 2       | 2440         | 0.82          | 0.71        | 0.03        | -4.96             | -2.16  |
| Railway Estate                      |                      | 7       | 2812         | 2.49          | 0.39        | 0.09        | -3.23             | -1.69  |
| Rosslea                             |                      | 3       | 1733         | 1.73          | 0.58        | 0.06        | -3.94             | -1.66  |
| Rowes Bay-Belgian Gardens           |                      | 18      | 2493         | 7.22          | 0.31        | 0.24        | -2.03             | -0.79  |
| <b>South Townsville</b>             |                      | 48      | 2231         | <b>21.52</b>  | 0.19        | <b>0.70</b> | -0.72             | 0.01   |
| Stuart-Roseneath                    |                      | 1       | 1202         | 0.83          | 1.00        | 0.03        | -5.65             | -1.72  |
| Thuringowa (C) - Pt A Bal           |                      | 7       | 18900        | 0.37          | 0.39        | 0.01        | -5.21             | -3.69  |
| Vincent                             |                      | 4       | 2674         | 1.5           | 0.51        | 0.06        | -3.89             | -1.89  |
| West End                            |                      | 7       | 3723         | 1.88          | 0.39        | 0.06        | -3.55             | -2.02  |
| Wulguru                             |                      | 7       | 4870         | 1.44          | 0.42        | 0.04        | -3.94             | -2.3   |
| Yarrabah (S)                        | Yarrabah             | 4       | 2392         | 1.67          | 0.61        | 0.06        | -3.95             | -1.54  |
